# Supplementary material for: Echinacea angustifolia DC. Lipophilic Extract Patch for Skin Application: Preparation, In Vitro and In Vivo Studies
Source: MDPI journal article supplement (doi:10.3390/pharmaceutics12111096), 2020-11-16
Supplement: s1 [file s1]

# Supplementary Materials: *Echinacea Angustifolia* DC. Lipophilic Extract Patch for Skin Application: Preparation, in Vitro and in Vivo Studies

Dritan Hasa, Simon Žakelj, Iztok Grabnar, Francesco Cilurzo, Stefano Dall'Acqua, Antonella Riva, Beatrice Perissutti and Dario Voinovich

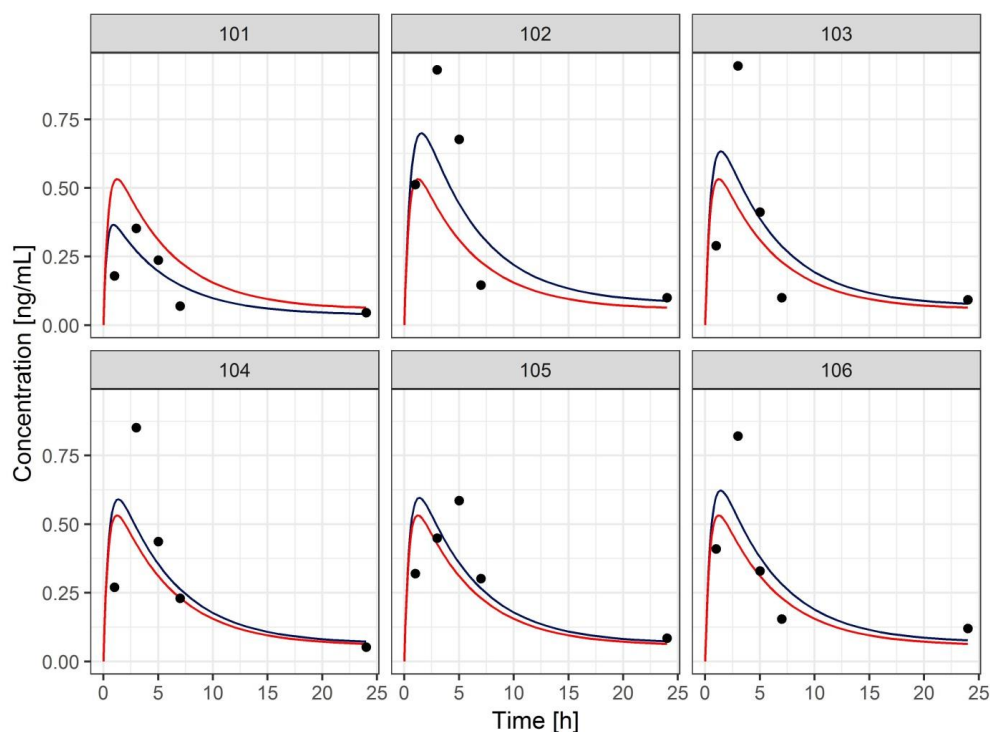

**Figure S1.** Individual plasma concentration profiles of tetraene after administration of transdermal patch in 6 subjects with predictions of the pharmacokinetic model (circles—experimental measurements, red line—population prediction, blue line—individual prediction).

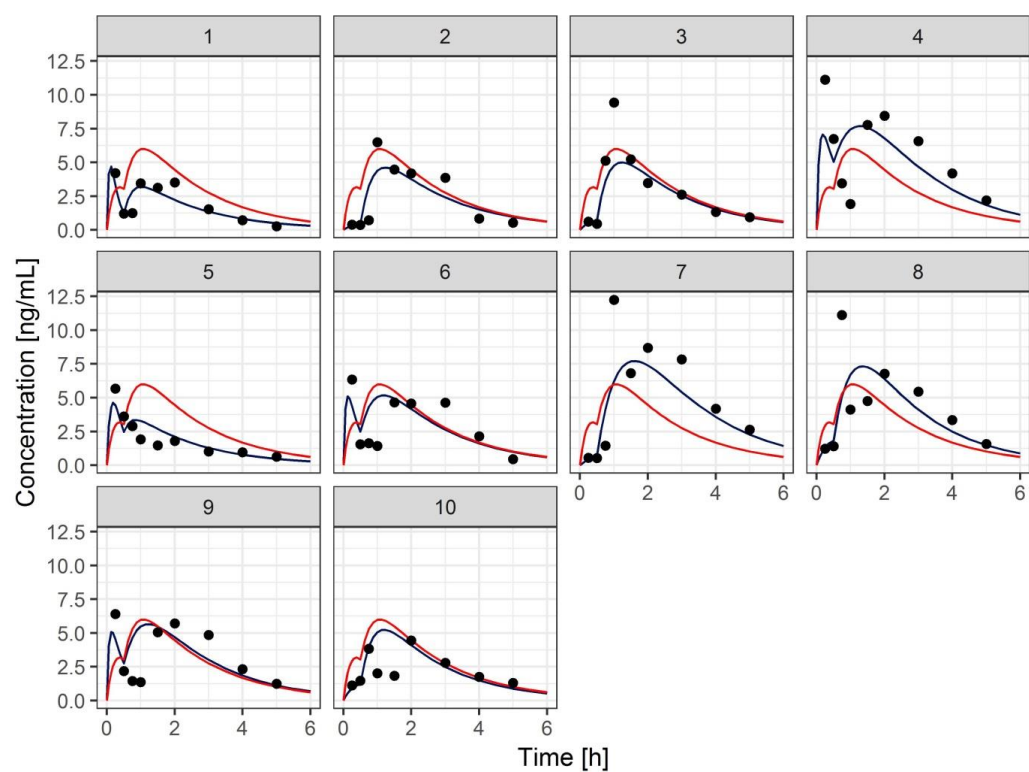

**Figure S2.** Individual plasma concentration profiles of tetraene after administration of softgel capsules in 10 subjects with predictions of the pharmacokinetic model (circles–experimental measurements, red line–population prediction, blue line–individual prediction).
